# Supplementary material for: Overstuffing the patellofemoral compartment in total knee arthroplasty: a systematic review
Source: PubMed Central journal article supplement — EFORT Open Rev. 2023 Aug 1;8(8):597–605. doi: 10.1530/EOR-22-0107 (PMC10441255; doi:10.1530/eor-22-0107), 2023-08-01
Supplement: EOR-22-0107supplementary_table_1.pdf [file EOR-22-0107supplementary_table_1.pdf]

## Appendix A

Methodological Index for Non-Randomized Studies (MINORS)<sup>36</sup> guidelines to assess the methodological quality. The items are scored 0 (not reported), 1 (reported but inadequate) or 2 (reported and adequate)

Beldman et al<sup>33</sup>

| Item | Description                                          | Score |
|------|------------------------------------------------------|-------|
| 1    | A clearly stated aim                                 | 2     |
| 2    | Inclusion of consecutive patients                    | 2     |
| 3    | Prospective collection of data                       | 2     |
| 4    | Endpoints appropriate to the aim of the study        | 2     |
| 5    | Unbiased assessment of the study endpoint            | 2     |
| 6    | Follow-up period appropriate to the aim of the study | 1     |
| 7    | Loss to follow-up less than 5%                       | 1     |
| 8    | Prospective calculation of the study size            | 2     |
| 9    | Adequate control group                               |       |
| 10   | Contemporary groups                                  |       |
| 11   | Baseline equivalence of groups                       |       |
| 12   | Adequate statistical analyses                        |       |

Kemp et al<sup>34</sup>

| Item | Description                                          | Score |
|------|------------------------------------------------------|-------|
| 1    | A clearly stated aim                                 | 2     |
| 2    | Inclusion of consecutive patients                    | 2     |
| 3    | Prospective collection of data                       | 2     |
| 4    | Endpoints appropriate to the aim of the study        | 2     |
| 5    | Unbiased assessment of the study endpoint            | 2     |
| 6    | Follow-up period appropriate to the aim of the study | 1     |
| 7    | Loss to follow-up less than 5%                       | 1     |
| 8    | Prospective calculation of the study size            | 2     |
| 9    | Adequate control group                               |       |
| 10   | Contemporary groups                                  |       |
| 11   | Baseline equivalence of groups                       |       |
| 12   | Adequate statistical analyses                        |       |

Matz et al<sup>35</sup>

| Item | Description                                          | Score |
|------|------------------------------------------------------|-------|
| 1    | A clearly stated aim                                 | 2     |
| 2    | Inclusion of consecutive patients                    | 2     |
| 3    | Prospective collection of data                       | 2     |
| 4    | Endpoints appropriate to the aim of the study        | 1     |
| 5    | Unbiased assessment of the study endpoint            | 1     |
| 6    | Follow-up period appropriate to the aim of the study | 2     |

|    |                                           |   |
|----|-------------------------------------------|---|
| 7  | Loss to follow-up less than 5%            | 1 |
| 8  | Prospective calculation of the study size | 1 |
| 9  | Adequate control group                    |   |
| 10 | Contemporary groups                       |   |
| 11 | Baseline equivalence of groups            |   |
| 12 | Adequate statistical analyses             |   |

Pierson et al<sup>18</sup>

| Item | Description                                          | Score |
|------|------------------------------------------------------|-------|
| 1    | A clearly stated aim                                 | 2     |
| 2    | Inclusion of consecutive patients                    | 2     |
| 3    | Prospective collection of data                       | 2     |
| 4    | Endpoints appropriate to the aim of the study        | 2     |
| 5    | Unbiased assessment of the study endpoint            | 2     |
| 6    | Follow-up period appropriate to the aim of the study | 2     |
| 7    | Loss to follow-up less than 5%                       | 1     |
| 8    | Prospective calculation of the study size            | 2     |
| 9    | Adequate control group                               |       |
| 10   | Contemporary groups                                  |       |
| 11   | Baseline equivalence of groups                       |       |
| 12   | Adequate statistical analyses                        |       |

White et al<sup>7</sup>

| Item | Description                                          | Score |
|------|------------------------------------------------------|-------|
| 1    | A clearly stated aim                                 | 2     |
| 2    | Inclusion of consecutive patients                    | 2     |
| 3    | Prospective collection of data                       | 2     |
| 4    | Endpoints appropriate to the aim of the study        | 2     |
| 5    | Unbiased assessment of the study endpoint            | 1     |
| 6    | Follow-up period appropriate to the aim of the study | 2     |
| 7    | Loss to follow-up less than 5%                       | 1     |
| 8    | Prospective calculation of the study size            | 2     |
| 9    | Adequate control group                               |       |
| 10   | Contemporary groups                                  |       |
| 11   | Baseline equivalence of groups                       |       |
| 12   | Adequate statistical analyses                        |       |

Daluga et al<sup>26</sup>

| Item | Description                       | Score |
|------|-----------------------------------|-------|
| 1    | A clearly stated aim              | 2     |
| 2    | Inclusion of consecutive patients | 2     |
| 3    | Prospective collection of data    | 2     |

|    |                                                      |   |
|----|------------------------------------------------------|---|
| 4  | Endpoints appropriate to the aim of the study        | 2 |
| 5  | Unbiased assessment of the study endpoint            | 1 |
| 6  | Follow-up period appropriate to the aim of the study | 2 |
| 7  | Loss to follow-up less than 5%                       | 2 |
| 8  | Prospective calculation of the study size            | 1 |
| 9  | Adequate control group                               | 2 |
| 10 | Contemporary groups                                  | 2 |
| 11 | Baseline equivalence of groups                       | 2 |
| 12 | Adequate statistical analyses                        | 1 |
